# Supplementary material
Source: PubMed Central journal article supplement (PMC2840811)
Supplement: me.2009-0379_1.pdf [file me.2009-0379_1.pdf]

Supplemental Table 1. Wnt related mRNA transcripts expressed in primary osteoblast-enriched cell cultures from fetal rat bone\*

| <i>Higher abundance transcripts</i>             | <i>Lower abundance transcripts</i>          |
|-------------------------------------------------|---------------------------------------------|
| cyclin D1                                       | axin 1                                      |
| Dkk3                                            | $\beta$ -catenin                            |
| frizzled 1                                      | casein kinase II $\alpha$ 1                 |
| GSK3 $\alpha$                                   | C-terminal BP1                              |
| Jun                                             | cyclin D2                                   |
| protein phosphatase 2a & 2b, catalytic subunits | dishevelled 1                               |
| soluble frizzled related proteins 2 & 4         | ERM binding phosphoprotein                  |
| wisp-1                                          | frizzled 2                                  |
| wisp-2                                          | GSK3 $\beta$                                |
|                                                 | Lrp6                                        |
|                                                 | porcupine D                                 |
|                                                 | protein phosphatase 2, regulatory subunit A |
|                                                 | Rho A                                       |
|                                                 | soluble frizzled related protein 1          |
|                                                 | Tle3                                        |
|                                                 | TCF-4                                       |
|                                                 | Wnt9a                                       |

\*mRNA levels were analyzed with a commercial gene array, and abundance was estimated by relative signal fluorescence intensity, as determined by densitometry (Rat Wnt Signaling Pathway Microarray from, and contracted analysis by, SABiosciences).

Supplemental Table 2. Primer pairs for RT-PCR\*

| <i>Gene product</i>     | <i>Direction</i>   | <i>Sequence, 5' → 3'</i>                      | <i>Amplicon bp</i> | <i>Reference</i> |
|-------------------------|--------------------|-----------------------------------------------|--------------------|------------------|
| β-actin                 | forward<br>reverse | TGTCACCAACTGGGACGATA<br>GACCAGAGGCATACAGGGAC  | 215                | Primer-BLAST     |
| TβR1                    | forward<br>reverse | CTCACTGAGAGAACGGAGGG<br>GAACACCAGTGGTTCGGAGT  | 330                | Primer-BLAST     |
| TβR2                    | forward<br>reverse | TCACTAGGCACGTCATCAGC<br>GATTCTAGAACTTCCGGGGC  | 286                | Primer-BLAST     |
| TβR3                    | forward<br>reverse | CCGAGAACCAGAAGAAGTGC<br>AGTACCACAGCCATTCAGGG  | 208                | Primer-BLAST     |
| alkaline<br>phosphatase | forward<br>reverse | CGCCTATCAGCTAATGCACA<br>AGGGAAGGGTCAGTCAGGTT  | 315                | Primer-BLAST     |
| collagen α1             | forward<br>reverse | TCGATTCACCTACAGCACGC<br>GACTGTCTTGCCCCAAGTTCC | 67                 | (59)             |
| osteocalcin             | forward<br>reverse | ACGAGCTAGCGGACCACATT<br>CCCTAAACGGTGGTGCCATA  | 67                 | (59)             |
| TCF-4                   | forward<br>reverse | CGAACAACAGCTTCTCCTCC<br>TAATTGGGAGATGACGAGGC  | 115                | Primer-BLAST     |
| LEF-1                   | forward<br>reverse | AGACACCCACCAGCTCCTGA<br>CCTGAATCCACCCGTGATG   | 123                | (60)             |
| β-catenin               | forward<br>reverse | AGCTGAGATGGCCAGAAT<br>AAGGGCAAGGTTTCGAATCAA   | 127                | (60)             |
| Runx2                   | forward<br>reverse | AGCCTCTTCAGCGCAGTGAC<br>CTGGTGCTCGGATCCCAA    | 59                 | (59)             |

\*Primer sequences were obtained from the literature for rat (51), adapted from the mouse sequence to comply with rat (52), or predicted from a unique sequence search, using the Primer-BLAST program from the National Center for Biotechnology Information (<http://www.ncbi.nlm.nih.gov/tools/primer-blast/index.cgi>).

Supplemental Table 3. Oligomers used for nuclear protein binding by EMSA\*

| <i>Protein</i> | <i>Sequence, 5' → 3'</i>                             |
|----------------|------------------------------------------------------|
| TCF/LEF        | CCTGCAGGATCAAAGGGGGTAAGATCAAAGGGGGTA                 |
| Runx           | CAACCACAGGTTGGTTAACCACAGGTTGGAACCACAGGTTGGTTAACCACAC |
| AP-1           | CGATGCATTGATGAGTCAGGTATGCAT                          |
| Smad           | CGGAGTATGTCTAGACTGACAATGTAC                          |

\*Binding sequences (underlined) were obtained from the MatInspector program from Genomatix (<http://www.genomatix.de>).
